# Supplementary material for: A Facile Strategy toward the Preparation of a High-Performance Polyamide TFC Membrane with a CA/PVDF Support Layer
Source: MDPI journal article supplement (doi:10.3390/nano12244496), 2022-12-19
Supplement: s1 [file s1]

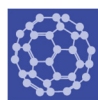

# A Facile Strategy toward the Preparation of a High-Performance Polyamide TFC Membrane with a CA/PVDF Support Layer

Feng Liu <sup>1,2</sup>, Yanyan Li <sup>3</sup>, Lun Han <sup>1</sup>, Zhenzhen Xu <sup>1</sup>, Yuqi Zhou <sup>4</sup>, Bingyao Deng <sup>4,\*</sup> and Jian Xing <sup>1,\*</sup>

<sup>1</sup> School of Textile and Garment, Anhui Polytechnic University, Wuhu 241000, China

<sup>2</sup> Advanced Fiber Materials Engineering Research Center of Anhui Province, Anhui Polytechnic University, Wuhu 241000, China

<sup>3</sup> College of Materials and Textile Engineering, Jiaying University, Jiaying 314001, China

<sup>4</sup> Laboratory for Advanced Nonwoven Technology, Key Laboratory of Eco-Textiles, Ministry of Education, Jiangnan University, Wuxi 214122, China

Correspondence: bydeng@jiangnan.edu.cn (B.D.); xingjian@ahpu.edu.cn (J.X.); Tel.: +86-13806185561 (B.D.)

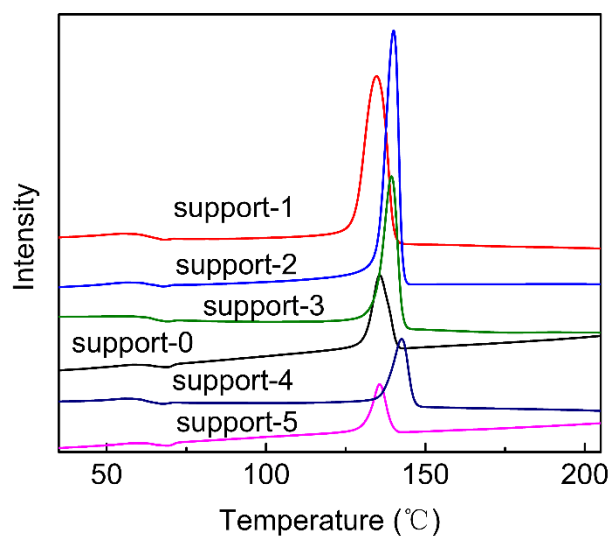

Figure S1. The DSC temperature-rising curves of different supports.

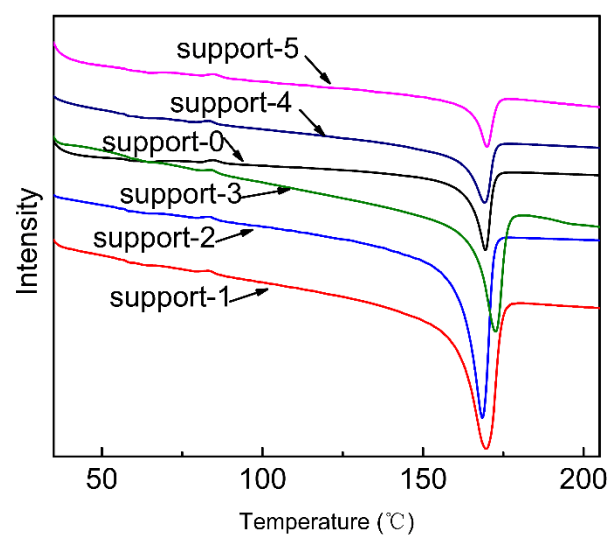

**Figure S2.** The DSC lowering temperature curves of different supports.

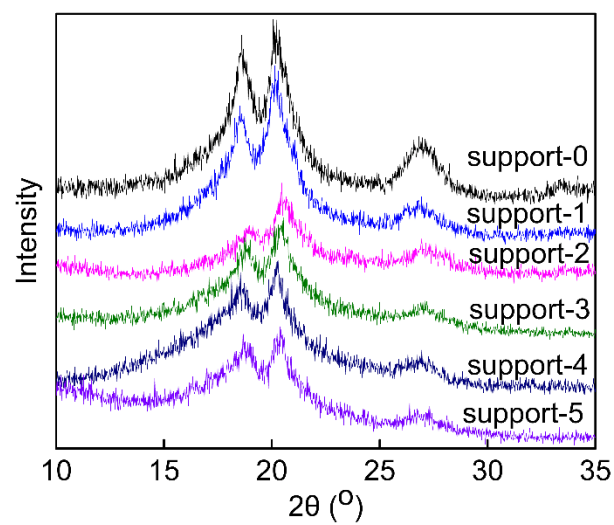

**Figure S3.** The XRD curves of different supports.

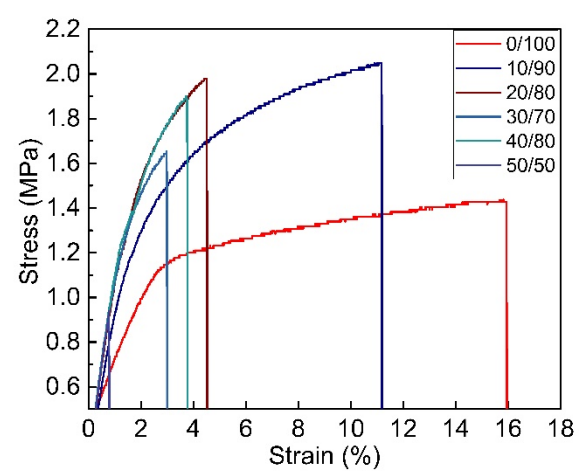

**Figure S4.** The stress-strain curves of different supports.
